# Supplementary material for: The Role of Response Efficacy and Self-efficacy in Disaster Preparedness Actions for Vulnerable Households
Source: Copernicus journal article supplement (doi:10.5194/egusphere-2022-1349), 2023-02-20
Supplement: Supplementary file [file egusphere-2022-1349-RC1-supplement.pdf]

all in all, good research paper.

to revise:

mainly for the literature review chapter aim to give more details as some sections are not too clear.

Line 23

1.7 people around the world were ...

Line 124.

Change In contrast, to Additionally,

Line 180

Three Hypotheses not Four

Line 233

taking steps to prepare to help you get through a disaster in your area?" remove second to.
